# Supplementary material for: Case report: Anti-ARHGAP26 autoantibodies in atypical dementia with Lewy bodies
Source: PubMed Central journal article supplement (PMC11285637; doi:10.3389/frdem.2023.1227823), 2023-08-03
Supplement: Data_Sheet_1.pdf [file Data_Sheet_1.pdf]

**Table 1: Clinical and CSF data**

| PARAMETER                       | First presentation | 20 month later           | 23 month later            |
|---------------------------------|--------------------|--------------------------|---------------------------|
| <b>Demographic parameter</b>    |                    |                          |                           |
| Age y                           | 78                 | 80                       | 80                        |
| Age of onset y                  | 73                 | 73                       | 73                        |
| <b>MMSE</b>                     | 25/30              | 26/30                    |                           |
| <b>GDS</b>                      | 01                 | 01                       |                           |
| <b>B-ADL</b>                    | 5.7                | 4.8                      |                           |
| <b>CSF parameter</b>            |                    |                          |                           |
| Cell count (<5 $\mu$ l)         | 0                  | 1                        | -                         |
| Lactate mmol/l                  | 1.3                | 1.1                      | -                         |
| Albumin mg/L                    | 169                | 151                      | -                         |
| Total protein mg/L              | 275                | 266                      | -                         |
| IgG mg/L                        | 16.1               | 13.4                     | -                         |
| IgA mg/L                        | 1.7                | 1.5                      | -                         |
| IgM mg/L                        | 0.31               | 0.16                     | -                         |
| QAlbumin                        | 3.9                | 3.9                      | -                         |
| QIgG                            | 2                  | 1.9                      | -                         |
| QIgA                            | 0.76               | 0.84                     | -                         |
| QIgM                            | 0.45               | 0.34                     | -                         |
| Measles AI                      | 0.9                | 0.9                      | -                         |
| Rubella AI                      | 0.8                | 0.8                      | -                         |
| VZV AI                          | 0.9                | 1                        | -                         |
| Tau protein (<320pg/ml)         | 313                | 359                      | -                         |
| P Tau protein 181 (<50pg/ml)    | 50.7               | 42.1                     | -                         |
| A $\beta$ 42 (>620 pg/ml)       | 1603               | 1290                     | -                         |
| A $\beta$ 40                    | 15747              | 12392                    | -                         |
| Ratio A $\beta$ 42/40 (>0.06)   | 0.102              | 0.104                    | -                         |
| Blood brain barrier disturbance | 0                  | 0                        | -                         |
| Intrathecal IgG synthesis       | 0                  | 0                        | -                         |
| autoantibodies                  | 0                  | Anti-ARHGAP26 +<br>1:1   | -                         |
| ASI                             |                    | 16.32                    |                           |
| <b>Serum</b>                    |                    |                          |                           |
| autoantibodies                  | 0                  | Anti-ARHGAP26<br>++ 1:32 | Anti-ARHGAP26 ++<br>1:100 |

**Abbreviations:** AI = antibody index, A $\beta$ 40 = amyloid- $\beta$  40, A $\beta$ 42 = Amyloid- $\beta$  42, ASI = antibody specific index, B-ADL = Bayer Activity of Daily Living Scale, CSF = cerebrospinal fluid, GDS = Geriatric Depression Scale, IgA = immunoglobulin A, IgG = immunoglobulin G, IgM = immunoglobulin M, MMSE = Mini Mental Status Examination, P Tau Protein 181 = phosphorylated tau protein 181, Q = Quotient, ratio A $\beta$ 42/40 = ratio of amyloid- $\beta$  42/ ratio of amyloid- $\beta$  40, VZV = Varizella zoster virus, y = years. The values are depicted as mean  $\pm$  standard deviation. For laboratory data normal ranges are shown in brackets. CSF analysis was done in the Neurochemistry Laboratory from the Department of Neurology, University Medical Center Göttingen. All cell destruction parameter were derived from the Laboratory for Clinical Neurochemistry and Dementia Diagnostics of the Department of Psychiatry and Psychotherapy, University Hospital Erlangen.
